# Supplementary material for: Ultra-high Seebeck coefficient and low thermal conductivity of a centimeter-sized perovskite single crystal acquired by a modified fast growth method
Source: Royal Society of Chemistry journal article supplement (doi:10.1039/c6tc04594d), 2017-01-01
Supplement: c6tc04594d1.pdf [file c6tc04594d1.pdf]

# Supporting Information

## Ultra-High Seebeck Coefficient and Low Thermal Conductivity of Centimeter-sized Perovskite Single Crystal Acquired by a Modified Fast Growth Method

Tao Ye,<sup>a,b†</sup> Xizu Wang,<sup>a†</sup> **Xianqiang Li,**<sup>c</sup> Alex Qingyu Yan,<sup>c</sup> Seeram Ramakrishna,<sup>b\*</sup> Jianwei Xu<sup>a\*</sup>

<sup>a</sup>: Institute of Materials Research and Engineering (IMRE), Agency for Science, Technology and Research (A\*STAR), #08-03, 2 Fusionopolis Way, Innovis, 138634, Singapore. Email: jw-xu@imre.a-star.edu.sg

<sup>b</sup>: Department of Mechanical Engineering and Centre of Nanofibers and Nanotechnology (NUSCNN), National University of Singapore, Singapore 117576, Singapore. Email: seeram@nus.edu.sg

<sup>c</sup>: School of Materials Science and Engineering, Nanyang Technological University, Singapore 639798, Singapore.

†Equal contribution

### Corresponding Author:

Email: jw-xu@imre.a-star.edu.sg (J. W. X.)

Email: seeram@nus.edu.sg (S. R.)

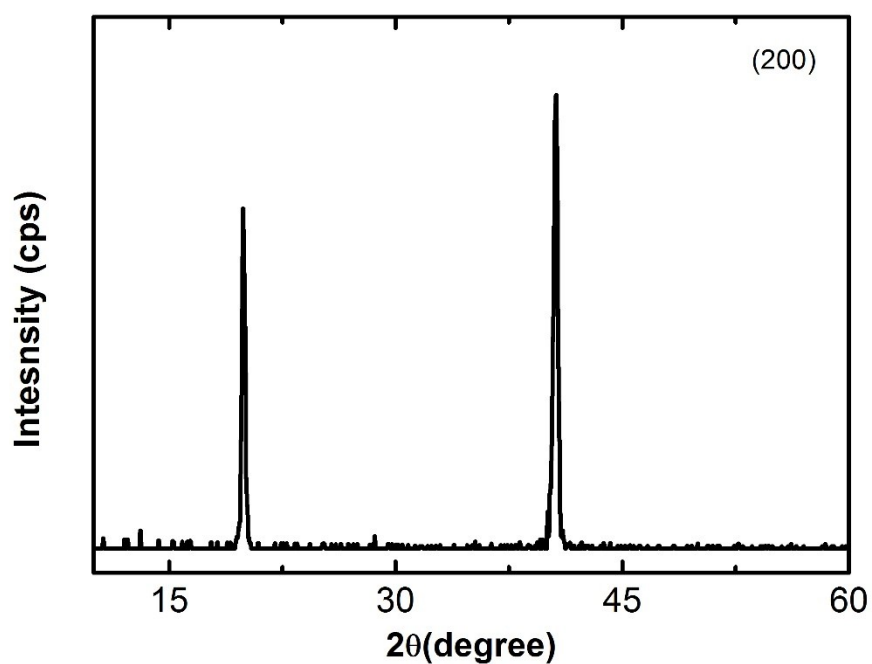

Figure S1.  $2\theta$  scan profile for the large perovskite  $\text{CH}_3\text{NH}_3\text{PbI}_3$  crystal for the (200) plane.

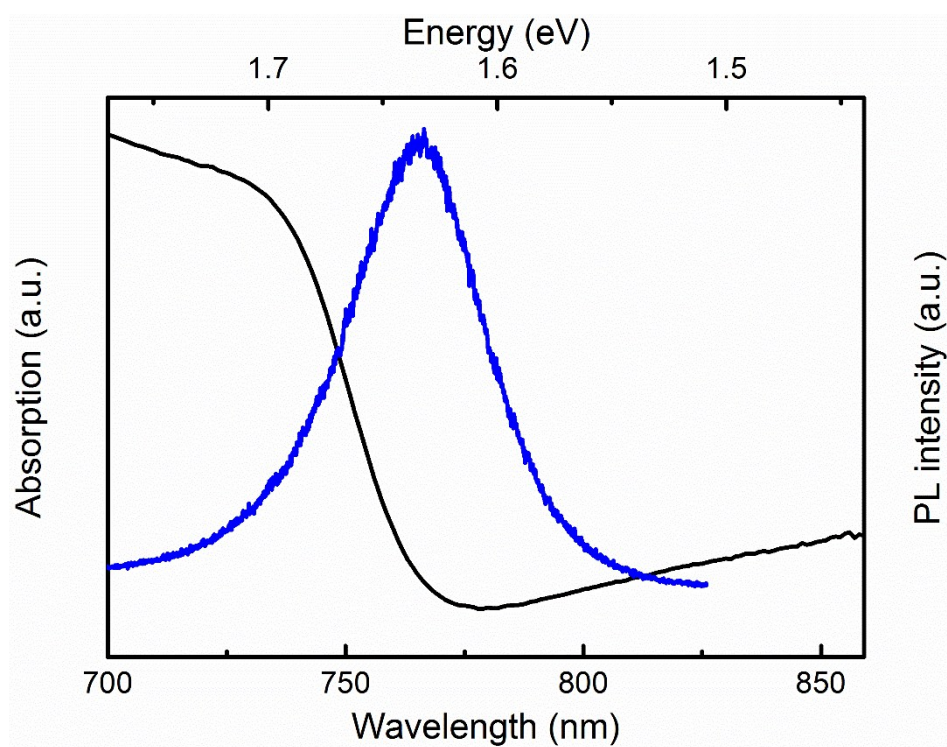

Figure S2. Optical absorption (black) and PL (blue) of a  $\text{MAPbI}_3$  thin film sample.

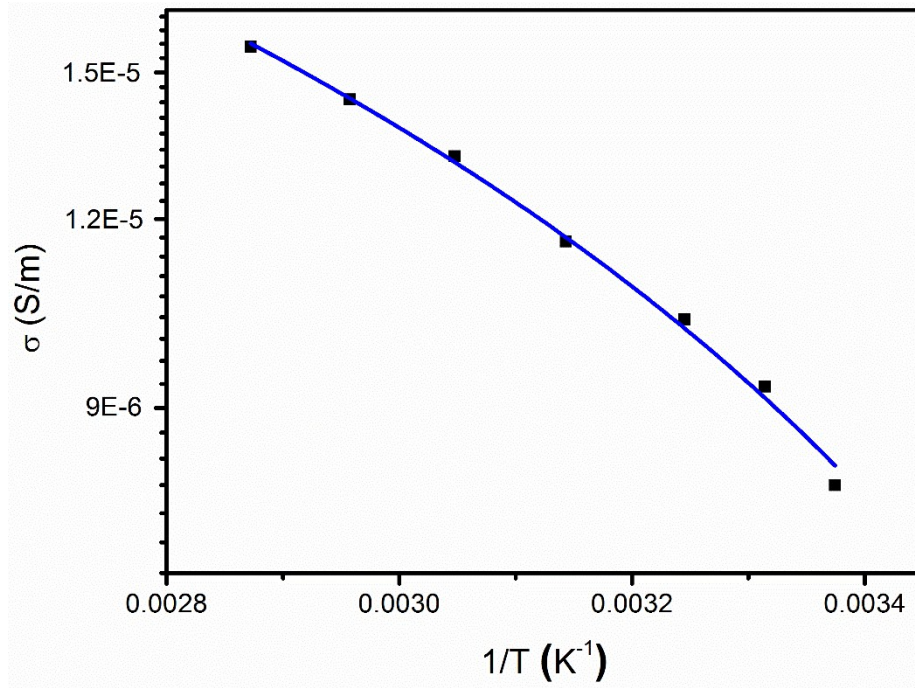

Figure S3. Arrhenius plot of the electrical conductivity of the perovskite single crystal.

The thermally activated relation can be defined as:  $\delta \sim \exp(E_a/T)$ ,  $E_a$  is the energy barrier.
